# Supplementary material
Source: publisher site journal article supplement (https://www.dovepress.com/article/409617)
Supplement: Supplementary file 1 [file get_supplementary_file.php]

Supplementary Material

# Supplementary Figures and Tables

**Supplementary Table 1. Geographical Distribution of Leading Units in China, 2009–2022**

| No. of leading units | | | |
| --- | --- | --- | --- |
| Leading units of trials according to Province | Thyroid Carcinoma | Non-tumorous  Thyroid Disease | Total |
| Shanghai | 4 | 3 | 7 |
| Beijing | 4 | 0 | 4 |
| Anhui | 2 | 2 | 4 |
| Jilin | 2 | 1 | 3 |
| Hubei | 1 | 2 | 3 |
| Jiangsu | 2 | 0 | 2 |
| Sichuan | 1 | 1 | 2 |
| Tianjin | 2 | 0 | 2 |
| Zhejiang | 0 | 2 | 2 |
| Fujian | 0 | 1 | 1 |
| Guangdong | 1 | 0 | 1 |
| Guangxi | 0 | 1 | 1 |
| Guizhou | 0 | 1 | 1 |
| Hebei | 1 | 0 | 1 |
| Henan | 1 | 0 | 1 |
| Shandong | 1 | 0 | 1 |
| Total | 22 | 14 | 36 |

Shown are the number of the leading units of drug clinical trials on thyroid diseases at least once in China from 2009 to 2022.
